## ANESTHESIOLOGY

# Intraoperative Mechanical Ventilation and Postoperative Pulmonary Complications after Cardiac Surgery

Michael R. Mathis, M.D., Neal M. Duggal, M.D., Donald S. Likosky, Ph.D., Jonathan W. Haft, M.D., Nicholas J. Douville, M.D., Ph.D., Michelle T. Vaughn, M.P.H., Michael D. Maile, M.D., M.S., Randal S. Blank, M.D., Ph.D., Douglas A. Colquhoun, M.B., Ch.B., M.Sc., M.P.H., Raymond J. Strobel, M.D., M.S., Allison M. Janda, M.D., Min Zhang, Ph.D., Sachin Kheterpal, M.D., M.B.A., Milo C. Engoren, M.D.

*ANESTHESIOLOGY* 2019; 131:1046–62

## EDITOR'S PERSPECTIVE

### What We Already Know about This Topic

- Modern ventilation approaches use a bundle of lower tidal volumes, lower driving pressures, and positive end-expiratory pressure
- The contributions of each component to reducing postoperative pulmonary complications in an adult cardiac surgical population is not known

### What This Article Tells Us That Is New

- In this retrospective analysis, the intraoperative ventilation bundle was associated with a lower rate of postoperative pulmonary complications
- Lower modified driving pressure was independently associated with fewer pulmonary complications

Postoperative pulmonary complications, a well-documented group of complications after cardiac surgery, are associated with a fourfold increase in mortality,<sup>1,2</sup> extended intensive care unit (ICU) and hospital lengths of stay,<sup>2,3</sup> and more than \$20,000 in institutional expenses per event.<sup>3–5</sup> In the cardiac surgery population, measurable derangements

## ABSTRACT

**Background:** Compared with historic ventilation strategies, modern lung-protective ventilation includes lower tidal volumes ( $V_T$ ), lower driving pressures, and application of positive end-expiratory pressure (PEEP). The contributions of each component to an overall intraoperative protective ventilation strategy aimed at reducing postoperative pulmonary complications have neither been adequately resolved, nor comprehensively evaluated within an adult cardiac surgical population. The authors hypothesized that a bundled intraoperative protective ventilation strategy was independently associated with decreased odds of pulmonary complications after cardiac surgery.

**Methods:** In this observational cohort study, the authors reviewed nonemergent cardiac surgical procedures using cardiopulmonary bypass at a tertiary care academic medical center from 2006 to 2017. The authors tested associations between bundled or component intraoperative protective ventilation strategies ( $V_T$  below 8 ml/kg ideal body weight, modified driving pressure [peak inspiratory pressure – PEEP] below 16 cm H<sub>2</sub>O, and PEEP greater than or equal to 5 cm H<sub>2</sub>O) and postoperative outcomes, adjusting for previously identified risk factors. The primary outcome was a composite pulmonary complication; secondary outcomes included individual pulmonary complications, postoperative mortality, as well as durations of mechanical ventilation, intensive care unit stay, and hospital stay.

**Results:** Among 4,694 cases reviewed, 513 (10.9%) experienced pulmonary complications. After adjustment, an intraoperative lung-protective ventilation bundle was associated with decreased pulmonary complications (adjusted odds ratio, 0.56; 95% CI, 0.42–0.75). *Via* a sensitivity analysis, modified driving pressure below 16 cm H<sub>2</sub>O was independently associated with decreased pulmonary complications (adjusted odds ratio, 0.51; 95% CI, 0.39–0.66), but  $V_T$  below 8 ml/kg and PEEP greater than or equal to 5 cm H<sub>2</sub>O were not.

**Conclusions:** The authors identified an intraoperative lung-protective ventilation bundle as independently associated with reduced pulmonary complications after cardiac surgery. The findings offer insight into components of protective ventilation associated with adverse outcomes and may serve as targets for future prospective interventional studies investigating the impact of specific protective ventilation strategies on postoperative outcomes after cardiac surgery.

(*ANESTHESIOLOGY* 2019; 131:1046–62)

in pulmonary function occur in nearly all patients,<sup>6,7</sup> and approximately 10% to 25% develop postoperative pulmonary complications requiring substantial healthcare resource utilization.<sup>1,6</sup>

Cardiopulmonary bypass (CPB), mechanical ventilation, and surgical manipulation of the thoracic cavity each

Supplemental Digital Content is available for this article. Direct URL citations appear in the printed text and are available in both the HTML and PDF versions of this article. Links to the digital files are provided in the HTML text of this article on the Journal's Web site ([www.anesthesiology.org](http://www.anesthesiology.org)).

Submitted for publication October 8, 2018. Accepted for publication July 2, 2019. Corrected on October 17, 2019. From the Departments of Anesthesiology (M.R.M., N.M.D., N.J.D., M.T.V., M.D.M., D.A.C., A.M.J., S.K., M.C.E.) and Cardiac Surgery (D.S.L., J.W.H., R.J.S.), University of Michigan Medical School, and Department of Biostatistics, University of Michigan (M.Z.), Ann Arbor, Michigan; Department of Anesthesiology, University of Virginia School of Medicine, Charlottesville, Virginia (R.S.B.).

Copyright © 2019, the American Society of Anesthesiologists, Inc. All Rights Reserved. *Anesthesiology* 2019; 131:1046–62. DOI: 10.1097/ALN.0000000000002909

play major roles in the evolution of pulmonary injury.<sup>1</sup> Preoperative, intraoperative, and postoperative factors impact a patient's ability to cope with these insults.<sup>7,8</sup> Several externally validated risk scores incorporating these factors have been developed to improve risk stratification for postoperative pulmonary complications after cardiac surgery.<sup>9,10</sup> Despite rigorous model development, shortcomings of postoperative pulmonary complication prediction models remain evident. One recent multicenter study demonstrated that a large proportion of variation in pneumonia rates remains unexplained by prediction models focused on surgical technique and underlying patient risk, suggesting that other unmeasured practices may account for the differences observed.<sup>11</sup> One such process of care associated with postoperative pulmonary complications, yet not accounted for in current prediction models, is the practice of intraoperative lung-protective ventilation. Compared with historic intraoperative ventilation techniques, modern lung-protective ventilation strategies use lower tidal volumes ( $V_T$ ),<sup>1,4,5,12–15</sup> lower driving pressures,<sup>16–18</sup> and positive end-expiratory pressure (PEEP).<sup>13,15,19</sup> These techniques have already gained acceptance in ICUs after large studies have demonstrated reduced morbidity and mortality.<sup>18,20</sup> However, the contributions of each component to an overall intraoperative lung-protective ventilation strategy aimed at reducing postoperative pulmonary complications (postoperative pulmonary complications) have not been comprehensively studied in an adult cardiac surgical population.

Although ICU ventilation after cardiac surgery has been assessed,<sup>21,22</sup> scarce data currently exist evaluating the relationship between intraoperative ventilator management during cardiac surgery, postoperative pulmonary complications, and mortality. Because the post-CPB intraoperative period represents a unique transition from often nonventilated to ventilated lungs, optimizing respiratory mechanics to reduce lung injury is of critical concern. To better characterize this currently understudied relationship, we performed an observational cohort study using the Society of Thoracic Surgeons and Multicenter Perioperative Outcomes Group databases at our institution. We hypothesized that a bundled intraoperative lung-protective ventilation strategy (*i.e.*, lower  $V_T$ , driving pressure, and application of PEEP) was independently associated with decreased odds of postoperative pulmonary complications after cardiac surgery, when adjusted within a novel, robust multivariable model leveraging data uniquely available from each database. We additionally hypothesized that when studied as separate exposures, components of the intraoperative bundled lung-protective ventilation strategy had differential associations with postoperative pulmonary complications.

## Materials and Methods

We obtained Institutional Review Board approval (HUM00132314) for this observational cohort study performed at our academic quaternary care center; the

requirement for informed patient consent was waived. We adhered to the Strengthening the Reporting of Observational Studies in Epidemiology checklist for reporting observational studies. Study methods including data collection, outcomes, and statistical analysis were established prospectively and presented at an institutional peer-review committee on January 20, 2016; a revised finalized proposal was registered before accessing study data.<sup>23</sup>

## Patient Population

Inclusion criteria for the study were adult (at least 18 yr old) patients who underwent elective or urgent cardiac surgical procedures with full CPB, limited to coronary artery bypass grafting, valve, and aortic procedures, performed in isolation or in combination. We reviewed patients over a continuous 11-yr study period from January 1, 2006 to June 1, 2017. Exclusion criteria were preoperative mechanical ventilation within 60 days of surgery, use of a double-lumen endotracheal tube or one-lung ventilation, American Society of Anesthesiologists class V or VI physical status, preoperative extracorporeal membrane oxygenation support, ventricular assist device implantation procedures (planned and unplanned), reoperative cardiac surgical procedures, transcatheter procedures, or procedures using partial- or left-heart bypass. At our institution, surgical techniques for the study cohort commonly included direct aortic cannulation *via* full sternotomy, and rarely, axillary or femoral cannulation or direct cannulation *via* mini-sternotomy. No robotic procedures or minimally invasive direct coronary artery bypass procedures were performed.

## Data Collection

We collected study data from three sources: the Multicenter Perioperative Outcomes Group electronic anesthesia database, the Society of Thoracic Surgeons Adult Cardiac Surgery Database, and our hospital enterprise electronic health record. Within the Multicenter Perioperative Outcomes Group database, physiologic monitors including vital signs and ventilator settings and measurements are collected in automated fashion every 60s and stored in an electronic intraoperative anesthesia record for all cases. Templated intraoperative script elements—including case times, medications and fluids administered, and anesthetic interventions such as airway management techniques—are additionally routinely recorded within the anesthesia record for all cases. Within the Society of Thoracic Surgeons database, patient history, surgical procedure, and outcome data are similarly stored as discrete concepts for all adult cardiac surgical procedures performed within our institution. To maintain high rates of interobserver agreement across cases, data are standardized using detailed prespecified definitions, and are collected (Society of Thoracic Surgeons database)<sup>24</sup> or validated (Multicenter Perioperative Outcomes Group database) by nurses with completed training in data definitions used. Detailed methods for data entry, validation,

and quality assurance are described elsewhere,<sup>25–27</sup> and have been used for multiple published studies.<sup>28–31</sup> Within the Multicenter Perioperative Outcomes Group and Society of Thoracic Surgeons databases, local datasets were linked *via* unique codified surgical case and patient identifiers; data extraction and analysis were performed on a secure server. Finally, local electronic health record data (Epic Systems Corporation, USA) were used to determine postoperative arterial blood gas values and ICU ventilator data, as necessary for components of outcome variables described below; these data were similarly linked to the final analytic dataset. The quality of local electronic health record data used for this study was verified *via* manual review by an anesthesiologist investigator (M.R.M.) of all cases experiencing the primary outcome, all cases with outlier data, and 10% of cases not experiencing the primary outcome.

### Clinical Processes of Care

Perioperative anesthetic management for all cases was at the discretion of the attending cardiac anesthesiologist, who directs an anesthesia care team of anesthesiology fellows and residents. Routinely, anesthetic agents included induction with midazolam, propofol, or etomidate; analgesia with fentanyl or morphine; neuromuscular blockade with rocuronium, vecuronium, or cisatracurium; and maintenance with isoflurane, transitioned to a propofol or dexmedetomidine infusion before transport to ICU. In addition to standard monitoring, intraoperative hemodynamic management was routinely guided by invasive arterial line, central venous pressure, and pulmonary artery catheter monitors, as well as transesophageal echocardiography and arterial/mixed venous blood gas measurements. Fluids, blood products, vasoactive infusions, and inotropic infusions were managed at the discretion of the attending anesthesiologist in communication with the cardiac surgeon, with typical hemodynamic targets including a mean arterial pressure greater than 65 mmHg, cardiac index greater than 2.2 l/min/m<sup>2</sup>, mixed venous oxygen saturation greater than 65%, hematocrit greater than 21%, and echocardiographic assessment of post-CPB ventricular systolic function unchanged to improved compared with pre-CPB function.

Ventilator settings in the operating room were managed by the attending anesthesiologist. Intubation was performed with a 7.5- or 8.0-mm-internal-diameter endotracheal tube. Mechanical ventilation was performed using Aisys CS2 anesthesia workstations (General Electric Healthcare, USA). Providers typically employed a pressure-controlled volume-guaranteed ventilation mode (default setting) throughout the entire study period, targeting normocapnia or mild hypocapnia, and avoiding hypoxemia. Of note, default settings on ventilators used included  $V_T = 500$  ml and PEEP = 0 cm H<sub>2</sub>O; the default PEEP setting was subsequently changed to PEEP = 5 cm H<sub>2</sub>O in March 2007. Ventilation was paused during CPB; the ventilator circuit remained connected to the patient, but with no application

of PEEP. Before discontinuation of CPB, it was resumed after providing recruitment maneuvers. After transport to ICU, a structured handoff detailing intraoperative management, including final ventilator settings and plan for extubation, was communicated to an ICU team of intensivists, nurses, and respiratory therapists. Ventilator weaning, extubation, and management of complications were made at the discretion of the ICU team, as based on local protocols and targeting goals discussed during postoperative handoff.

### Outcomes

The primary outcome was occurrence of a postoperative pulmonary complication, predefined as a composite of pulmonary complications recorded in the Society of Thoracic Surgeons database and adjudicated by nurses trained in outcome definitions, or recorded in our enterprise electronic health record and adjudicated by an anesthesiologist (M.R.M.). These included any one of the following: prolonged initial postoperative ventilator duration longer than 24 h (Society of Thoracic Surgeons database), pneumonia (Society of Thoracic Surgeons database), reintubation (Society of Thoracic Surgeons database), or postoperative partial pressure of oxygen to fractional inspired oxygen ( $PaO_2/FiO_2$ ) below 100 mmHg within 48 h postoperatively while intubated (local electronic health record, Appendix 1).

We selected a threshold of  $PaO_2/FiO_2$  below 100 mmHg as a postoperative pulmonary complication component based on previously validated assessments of pulmonary dysfunction associated with mortality after cardiac surgery.<sup>32–34</sup> Given varied mechanisms of pulmonary injury, and the distinction between pneumonia *versus* other pulmonary complications as described in recent consensus guidelines,<sup>35,36</sup> each component of the postoperative pulmonary complication composite outcome was also separately analyzed as a secondary outcome. Additional predefined secondary outcomes included 30-day postoperative mortality, initial postoperative mechanical ventilation duration, minimum  $PaO_2/FiO_2$  within 48 h postoperatively while intubated (as a continuous variable), length of ICU stay, and length of hospital stay. All secondary outcomes were similarly adjudicated by trained Society of Thoracic Surgeons nurse reviewers with the exception of minimum  $PaO_2/FiO_2$  which was adjudicated by an anesthesiologist (M.R.M.).

### Exposure Variables – Lung-protective Ventilation

The primary exposure variable studied was a bundled intraoperative lung-protective ventilation strategy, comprising median  $V_T$  below 8 ml/kg predicted body weight and median driving pressure below 16 cm H<sub>2</sub>O and median PEEP at or above 5 cm H<sub>2</sub>O. Varying lung-protective cut-offs for each ventilator component are currently described in the literature, ranging from  $V_T$  6 to 10 ml/kg predicted body weight,<sup>1,13,15</sup> driving pressure 8 to 19 cm H<sub>2</sub>O,<sup>16,18,37</sup> and PEEP 3 to 12 cm H<sub>2</sub>O.<sup>13,15</sup> Given these ranges, our

cutoffs were selected by inspection of previously collected ventilation practice institutional data, targeting upper quartiles (approximately 75% compliance for each component) to ensure class balance between cases with lung-protective ventilation *versus* non-lung-protective ventilation and to improve multivariable model discrimination.<sup>5,13,28,38–40</sup>

Predicted body weight (in kg) was calculated as:  $50 + 2.3 \cdot (\text{height [in]} - 60)$  for men;  $45 + 2.3 \cdot (\text{height [in]} - 60)$  for women.<sup>41</sup> Modified airway driving pressure was calculated as (peak inspiratory pressure – PEEP). As performed in previous studies,<sup>42</sup> we used modified driving pressure for all cases, given the lack of ventilator plateau pressure data available within our electronic medical record necessary for a true driving pressure calculation. To adjust for decisions to maintain normoxia rather than a lung-protective ventilation strategy (otherwise favoring lower  $\text{FiO}_2$  and moderate PEEP), intraoperative oxygen saturation measured by pulse oximetry and  $\text{FiO}_2$  were included as covariates. To summarize each ventilator variable on a per-case basis, median values while mechanically ventilated were calculated. Ventilator parameters while on CPB, during which ventilators were routinely paused, were excluded from the median value calculation. For descriptive purposes, ventilator parameters were additionally subdivided into median value pairs, separated into the pre-CPB and post-CPB periods. In cases with multiple instances of CPB, post-CPB ventilator parameters were analyzed after the final CPB instance.

### Covariate Data

For descriptive purposes and to adjust for confounding variables potentially associated with the exposure variables or study outcomes, a range of perioperative characteristics were included as covariates within our study. Patient anthropometric, medical history, anesthetic, surgical, and laboratory testing/study variables were selected as available within the Multicenter Perioperative Outcomes Group and Society of Thoracic Surgeons databases. All variables used in several existing scores for calculating risk of complications including postoperative pulmonary complications after cardiac surgery were included (e.g., cardiac surgery type, bypass times, comorbidities, etc.), in addition to other relevant descriptive covariates (table 1).<sup>9,10,43</sup> To evaluate for changes in practice and Society of Thoracic Surgeons database reporting over the study time period, the Society of Thoracic Surgeons Adult Cardiac Surgery Database version was included as a covariate; this resulted in four time periods for adjustment (1/1/2006–12/31/2007; 1/1/2008–6/30/2011; 7/1/2011–6/30/2014; 7/1/2014–5/31/2017). To account for variation in unmeasured intraoperative practices attributable to the attending anesthesiologist and potentially associated with postoperative pulmonary complications, we characterized attending anesthesiologists by tertiles of low/medium/high frequency of bundled intraoperative lung-protective ventilation use.

### Statistical Analysis

All statistical analyses were performed using SAS version 9.3 (SAS Institute, USA). Normality of continuous variables was graphically assessed using histograms and Q-Q plots. Continuous data were presented as mean  $\pm$  SD or median and interquartile range; binary data were summarized via frequency and percentage. Comparisons of continuous data were made using a two-tailed independent *t* test or a Mann–Whitney *U* test, and categorical data were compared by a Pearson chi-square or Fisher's exact test, as appropriate. Trend analyses of the components of the lung-protective ventilation bundle were completed using the Cochran–Armitage test. A *P* value less than 0.05 denoted statistical significance.

Before any multivariable analysis, collinearity among covariates was assessed using the variance inflation factor; variables with a variance inflation factor greater than 10 were excluded. To target development of a clinically usable reduced-fit postoperative pulmonary complication multivariable model avoiding overfitting, covariates meaningfully describing the study population but not used in existing cardiac surgery risk score models were additionally excluded from multivariable analysis. Missing data were handled via a complete case analysis. To further aid in covariate selection, we used the least absolute shrinkage and selection operators technique and restricted covariates to the number of outcomes divided by 10, while also accounting for the lung-protective ventilation bundle as well as lung-protective ventilation bundle components ( $V_T$ , driving pressure, and PEEP). We chose this variable selection technique, given its ability to perform regularization and variable selection to improve model accuracy and interpretability, particularly among analyses with a relatively large number of covariates and modest number of outcomes.<sup>44</sup> Using a multivariable logistic regression model, we characterized the risk-adjusted association between the primary exposure of intraoperative lung-protective ventilation bundle and the primary outcome of postoperative pulmonary complication. Additionally, we repeated our multivariable analysis to assess independent associations between each lung-protective ventilation bundle component and postoperative pulmonary complications. Overall model discrimination of logistic regression models was assessed using the *c* statistic. Secondary outcomes were assessed using multivariable linear regression models. Goodness-of-fit for linear regression models was summarized via *R*-squared; such models were evaluated using varied distributional assumptions (i.e., linear *versus* logarithmic transformations) for continuous secondary outcomes. Multilevel modeling clustering at the provider level was not possible because of limited sample size per provider; instead, the previously mentioned fixed covariate of anesthesiology attending lung-protective ventilation frequency tertile was used.

In addition to analyzing independent associations between an overall lung-protective ventilation strategy and



**Table 1.** Perioperative Patient Characteristics and Univariate/Bivariate Associations with Postoperative Pulmonary Complications

| Characteristic                                                        | Entire Cohort                                   | Postoperative Pulmonary Complication            |                                                 |             | % Cases with Complete Data |
|-----------------------------------------------------------------------|-------------------------------------------------|-------------------------------------------------|-------------------------------------------------|-------------|----------------------------|
|                                                                       | N = 4694                                        | No, N = 4181 (89.1%)                            | Yes, N = 513 (10.9%)                            | P Value     |                            |
|                                                                       | n (%) or Mean ± SD/Median [Interquartile Range] | n (%) or Mean ± SD/Median [Interquartile Range] | n (%) or Mean ± SD/Median [Interquartile Range] |             |                            |
| Preoperative characteristics                                          |                                                 |                                                 |                                                 |             |                            |
| Age                                                                   | 62 ± 14                                         | 62 ± 14                                         | 64 ± 14                                         | < .0001     | 100                        |
| Sex, male                                                             | 3,024 ± 64.4                                    | 2,730 ± 65.3                                    | 294 ± 57.3                                      | 0.0004      | 100                        |
| Race, non-white                                                       | 515 ± 11.0                                      | 442 ± 10.6                                      | 73 ± 14.2                                       | 0.0127      | 99.9                       |
| Height, cm                                                            | 172 ± 11                                        | 172 ± 10                                        | 170 ± 11                                        | < .0001     | 100                        |
| Actual body weight, kg                                                | 86.9 ± 21.0                                     | 87.0 ± 20.8                                     | 85.8 ± 22.8                                     | 0.2624      | 100                        |
| Predicted body weight, kg                                             | 65.8 ± 11.1                                     | 66.1 ± 11.0                                     | 63.6 ± 11.6                                     | < .0001     | 100                        |
| Body mass index, kg/m <sup>2</sup>                                    |                                                 |                                                 |                                                 | 0.1389      | 100                        |
| Underweight (< 18.5)                                                  | 52 ± 1.1                                        | 45 ± 1.1                                        | 7 ± 1.4                                         |             |                            |
| Normal weight (18.5–24.9)                                             | 1,090 ± 23.2                                    | 971 ± 23.2                                      | 119 ± 23.2                                      |             |                            |
| Overweight (25–29.9)                                                  | 1,724 ± 36.7                                    | 1,551 ± 37.1                                    | 173 ± 33.7                                      |             |                            |
| Class I obesity (30–34.9)                                             | 1,065 ± 22.7                                    | 954 ± 22.8                                      | 111 ± 21.6                                      |             |                            |
| Class II obesity (35–39.9)                                            | 448 ± 9.5                                       | 392 ± 9.4                                       | 56 ± 10.9                                       |             |                            |
| Class III obesity (≥ 40)                                              | 315 ± 6.7                                       | 268 ± 6.4                                       | 47 ± 9.2                                        |             |                            |
| Current smoker                                                        | 630 ± 13.4                                      | 551 ± 13.2                                      | 79 ± 15.4                                       | 0.1637      | 100                        |
| Chronic lung disease*                                                 | 543 ± 11.6                                      | 444 ± 10.6                                      | 99 ± 19.3                                       | < .0001     | 100                        |
| Recent pneumonia within one month                                     | 55 ± 1.2                                        | 45 ± 1.1                                        | 10 ± 2.0                                        | 0.0829      | 100                        |
| Sleep apnea                                                           | 490 ± 10.4                                      | 442 ± 10.6                                      | 48 ± 9.4                                        | 0.3957      | 100                        |
| Pulmonary hypertension                                                | 1,447 ± 30.8                                    | 1,296 ± 31.0                                    | 151 ± 29.4                                      | < .0001     | 99.5                       |
| Moderate (PA systolic pressure 31–55 mmHg)                            | 1,185 ± 25.2                                    | 1,088 ± 26.1                                    | 97 ± 19.1                                       |             |                            |
| Severe (PA systolic pressure > 55 mmHg)                               | 262 ± 5.6                                       | 208 ± 5.0                                       | 54 ± 10.7                                       |             |                            |
| New York Heart Association Class                                      |                                                 |                                                 |                                                 | < .0001     | 99.0                       |
| I                                                                     | 3,807 ± 81.9                                    | 3,448 ± 83.3                                    | 359 ± 70.8                                      |             |                            |
| II                                                                    | 305 ± 6.6                                       | 272 ± 6.6                                       | 33 ± 6.5                                        |             |                            |
| III                                                                   | 409 ± 8.8                                       | 326 ± 7.9                                       | 83 ± 16.4                                       |             |                            |
| IV                                                                    | 125 ± 2.7                                       | 93 ± 2.3                                        | 32 ± 6.3                                        |             |                            |
| Recent myocardial infarction < 21 days                                | 329 ± 7.0                                       | 275 ± 6.6                                       | 54 ± 10.5                                       | 0.0009      | 100                        |
| Preoperative left ventricular ejection fraction, %                    | 60 [55, 65]                                     | 60 [55, 65]                                     | 60 [50, 65]                                     | 0.0003      | 100                        |
| Poor mobility†                                                        | 2,353 ± 50.1                                    | 2,030 ± 48.6                                    | 323 ± 63.0                                      | < .0001     | 100                        |
| Extracardiac arteriopathy                                             | 931 ± 19.8                                      | 798 ± 19.1                                      | 133 ± 25.9                                      | 0.0002      | 100                        |
| Peripheral arterial disease                                           | 333 ± 7.1                                       | 278 ± 6.7                                       | 55 ± 10.7                                       | 0.0007      |                            |
| Carotid disease                                                       | 602 ± 12.8                                      | 519 ± 12.4                                      | 83 ± 16.2                                       | 0.0161      |                            |
| Amputation for arterial disease                                       | 69 ± 1.5                                        | 57 ± 1.4                                        | 12 ± 2.3                                        | 0.0830      |                            |
| Previous major vascular surgical intervention                         | 224 ± 4.8                                       | 188 ± 4.5                                       | 36 ± 7.0                                        | 0.0115      |                            |
| Dyslipidemia                                                          | 2,703 ± 57.6                                    | 2,419 ± 57.9                                    | 284 (55.4)                                      | 0.2803      | 100                        |
| Arrhythmia‡                                                           | 735 ± 15.7                                      | 626 ± 15.0                                      | 109 ± 21.3                                      | 0.0002      | 100                        |
| Renal Impairment                                                      |                                                 |                                                 |                                                 |             |                            |
| Creatinine clearance, ml · min <sup>−1</sup> · 1.73 m <sup>−2</sup> § | 76.5 ± 24.5                                     | 77.9 ± 23.8                                     | 65.2 ± 27.4                                     | < .0001     | 99.8                       |
| Dialysis requirement                                                  | 104 ± 2.2                                       | 72 ± 1.7                                        | 32 ± 6.2                                        | < .0001     | 100                        |
| Diabetes treated with Insulin                                         | 374 ± 8.0                                       | 312 ± 7.5                                       | 62 ± 12.1                                       | 0.0003      | 100                        |
| Liver disease                                                         | 77 ± 1.6                                        | 69 ± 1.7                                        | 8 ± 1.6                                         | 0.8785      | 100                        |
| Cancer                                                                | 225 ± 4.8                                       | 204 ± 4.9                                       | 21 ± 4.1                                        | 0.4318      | 100                        |
| Active endocarditis                                                   | 238 ± 5.1                                       | 197 ± 4.7                                       | 41 ± 8.0                                        | 0.0014      | 100                        |
| Critical preoperative state                                           | 410 ± 8.7                                       | 300 ± 7.2                                       | 110 ± 21.4                                      | < .0001     | 100                        |
| Preoperative ventilation                                              | (exclusion)                                     | (exclusion)                                     | (exclusion)                                     | (exclusion) | (exclusion)                |
| Preoperative inotropic support                                        | 366 ± 7.8                                       | 266 ± 6.4                                       | 100 ± 19.5                                      | < .0001     | 100                        |
| Cardiogenic shock                                                     | 24 ± 0.5                                        | 18 ± 0.4                                        | 6 ± 1.2                                         | 0.0268      | 100                        |
| Intra-aortic balloon pump                                             | 58 ± 1.2                                        | 34 ± 0.8                                        | 24                                              | < .0001     | 100                        |
| Hemoglobin, g/dl                                                      | 13.5 ± 1.9                                      | 13.6 ± 1.9                                      | 12.6 ± 2.2                                      | < .0001     | 99.7                       |
| Platelet count, K/ul                                                  | 225 ± 69                                        | 225 ± 68                                        | 223 ± 77                                        | 0.6178      | 99.7                       |
| White blood cell count, K/ul                                          | 6.8 [5.7, 8.3]                                  | 6.8 [5.7, 8.2]                                  | 7.4 [6.0, 9.1]                                  | < .0001     | 99.7                       |
| International normalized ratio                                        | 1.0 [1.0, 1.1]                                  | 1.0 [1.0, 1.0]                                  | 1.0 [1.0, 1.1]                                  | < .0001     | 99.6                       |
| Preoperative SpO <sub>2</sub> , %                                     | 97 [96, 98]                                     | 97 [96, 98]                                     | 97 [95, 98]                                     | < .0001     | 100                        |
| Preoperative respiratory rate                                         | 16 [16, 18]                                     | 16 [16, 18]                                     | 16 [16, 18]                                     | 0.0015      | 97.0                       |
| Acuity                                                                |                                                 |                                                 |                                                 | < .0001     | 100                        |
| Elective                                                              | 3,740 ± 79.7                                    | 3,409 ± 81.5                                    | 331 ± 64.5                                      |             |                            |
| Urgent                                                                | 954 ± 20.3                                      | 772 ± 18.5                                      | 182 ± 35.5                                      |             |                            |
| Surgical procedure type                                               |                                                 |                                                 |                                                 | < .0001     | 100                        |
| Aortic                                                                | 100 ± 2.1                                       | 84 ± 2.0                                        | 16 ± 3.1                                        |             |                            |
| Valve + Aortic                                                        | 927 ± 19.8                                      | 807 ± 19.3                                      | 120 ± 23.4                                      |             |                            |
| Valve + Aortic + CABG                                                 | 84 ± 1.8                                        | 63 ± 1.5                                        | 21 ± 4.1                                        |             |                            |

(Continued)

Table 1. (Continued)

| Characteristic                                                                                 | Entire Cohort<br>N = 4694<br>n (%) or<br>Mean $\pm$ SD/Median<br>[Interquartile Range] | Postoperative Pulmonary Complication                                              |                                                                                   | P Value | % Cases<br>with<br>Complete<br>Data |
|------------------------------------------------------------------------------------------------|----------------------------------------------------------------------------------------|-----------------------------------------------------------------------------------|-----------------------------------------------------------------------------------|---------|-------------------------------------|
|                                                                                                |                                                                                        | No, N = 4181 (89.1%)<br>n (%) or<br>Mean $\pm$ SD/Median<br>[Interquartile Range] | Yes, N = 513 (10.9%)<br>n (%) or<br>Mean $\pm$ SD/Median<br>[Interquartile Range] |         |                                     |
| Isolated CABG                                                                                  | 969 $\pm$ 20.6                                                                         | 892 $\pm$ 21.3                                                                    | 77 $\pm$ 15.0                                                                     |         |                                     |
| Isolated Valve                                                                                 | 2,078 $\pm$ 44.3                                                                       | 1,902 $\pm$ 45.5                                                                  | 176 $\pm$ 34.3                                                                    |         |                                     |
| Valve + CABG                                                                                   | 536 $\pm$ 11.4                                                                         | 433 $\pm$ 10.4                                                                    | 103 $\pm$ 20.1                                                                    |         |                                     |
| Admission type                                                                                 |                                                                                        |                                                                                   |                                                                                   | < .0001 | 100                                 |
| Admit                                                                                          | 3,488 $\pm$ 74.3                                                                       | 3,197 $\pm$ 76.5                                                                  | 291 $\pm$ 56.7                                                                    |         |                                     |
| Inpatient                                                                                      | 1,206 $\pm$ 25.7                                                                       | 984 $\pm$ 23.5                                                                    | 222 $\pm$ 43.3                                                                    |         |                                     |
| Date of surgery by STS version                                                                 |                                                                                        |                                                                                   |                                                                                   | < .0001 | 100                                 |
| 2.52 (Jan 2006 through Dec 2007)                                                               | 349 $\pm$ 7.4                                                                          | 312 $\pm$ 7.5                                                                     | 37 $\pm$ 7.2                                                                      |         |                                     |
| 2.61 (Jan 2008 through June 2011)                                                              | 1,286 $\pm$ 27.4                                                                       | 1,106 $\pm$ 26.5                                                                  | 180 $\pm$ 35.1                                                                    |         |                                     |
| 2.73 (July 2011 through June 2014)                                                             | 1,679 $\pm$ 35.8                                                                       | 1,482 $\pm$ 35.5                                                                  | 197 $\pm$ 38.4                                                                    |         |                                     |
| 2.81 (July 2014 through May 2017)                                                              | 1,380 $\pm$ 29.4                                                                       | 1,281 $\pm$ 30.6                                                                  | 99 $\pm$ 19.3                                                                     |         |                                     |
| ASA physical status                                                                            |                                                                                        |                                                                                   |                                                                                   | < .0001 | 100                                 |
| III                                                                                            | 1,476 $\pm$ 31.4                                                                       | 1,366 $\pm$ 32.7                                                                  | 110 $\pm$ 21.4                                                                    |         |                                     |
| IV                                                                                             | 3,218 $\pm$ 68.6                                                                       | 2,815 $\pm$ 67.3                                                                  | 403 $\pm$ 78.6                                                                    |         |                                     |
| Intraoperative characteristics                                                                 |                                                                                        |                                                                                   |                                                                                   |         |                                     |
| Perfusion time, h                                                                              | 2.2 $\pm$ 1.0                                                                          | 2.1 $\pm$ 1.0                                                                     | 2.9 $\pm$ 1.3                                                                     | < .0001 | 100                                 |
| Aortic crossclamp time, h                                                                      | 1.7 $\pm$ 0.8                                                                          | 1.7 $\pm$ 0.8                                                                     | 2.2 $\pm$ 1.1                                                                     | < .0001 | 99.7                                |
| Anesthesia duration, h                                                                         | 6.5 [5.4, 7.9]                                                                         | 6.4 [5.3, 7.7]                                                                    | 7.7 [6.4, 9.4]                                                                    | < .0001 | 100                                 |
| Anesthesia provider¶                                                                           |                                                                                        |                                                                                   |                                                                                   | 0.9443  | 100                                 |
| Low LPV user                                                                                   | 2,489 $\pm$ 53.0                                                                       | 2,214 $\pm$ 53.0                                                                  | 275 $\pm$ 53.6                                                                    |         |                                     |
| Medium LPV user                                                                                | 1,844 $\pm$ 39.3                                                                       | 1,646 $\pm$ 39.4                                                                  | 198 $\pm$ 38.6                                                                    |         |                                     |
| High LPV user                                                                                  | 361 $\pm$ 7.7                                                                          | 321 $\pm$ 7.7                                                                     | 40 $\pm$ 7.8                                                                      |         |                                     |
| Intraoperative albuterol                                                                       | 57 $\pm$ 1.2                                                                           | 46 $\pm$ 1.1                                                                      | 11 $\pm$ 2.1                                                                      | 0.0416  | 100                                 |
| Intraoperative diuretic                                                                        | 2,898 $\pm$ 61.7                                                                       | 2,588 $\pm$ 61.9                                                                  | 310 $\pm$ 60.4                                                                    | 0.5179  | 100                                 |
| Intraoperative vasopressor infusion (phenylephrine, norepinephrine, vasopressin)               | 4,294 $\pm$ 91.5                                                                       | 3,815 $\pm$ 91.3                                                                  | 479 $\pm$ 93.4                                                                    | 0.1036  | 100                                 |
| Intraoperative inotrope infusion (epinephrine, dobutamine, milrinone, isoproterenol, dopamine) | 1,723 $\pm$ 36.7                                                                       | 1,397 $\pm$ 33.4                                                                  | 326 $\pm$ 63.6                                                                    | < .0001 | 100                                 |
| Total intraoperative opioid, oral morphine equivalents                                         | 300 [270, 360]                                                                         | 300 [270, 360]                                                                    | 300 [240, 375]                                                                    | 0.0177  | 99.9                                |
| Total intraoperative crystalloid, liter                                                        | 3.0 [2.0, 4.3]                                                                         | 3.0 [2.0, 4.1]                                                                    | 3.4 [2.3, 5.3]                                                                    | < .0001 | 98.8                                |
| Total intraoperative colloid, liter                                                            | 0 [0, 0.5]                                                                             | 0 [0, 0.5]                                                                        | 0 [0, 0.5]                                                                        | 0.3498  | 100                                 |
| Intraoperative packed red blood cells, units                                                   | 0 [0, 2]                                                                               | 0 [0, 2]                                                                          | 2 [0, 4]                                                                          | < .0001 | 100                                 |
| Intraoperative red blood cell salvage, liter                                                   | 0 [0, 0]                                                                               | 0 [0, 0]                                                                          | 0 [0, 0]                                                                          | 0.9154  | 100                                 |
| Intraoperative fresh frozen plasma, units                                                      | 0 [0, 0]                                                                               | 0 [0, 0]                                                                          | 0 [0, 2]                                                                          | < .0001 | 100                                 |
| Intraoperative platelets, units                                                                | 0 [0, 0]                                                                               | 0 [0, 0]                                                                          | 0 [0, 2]                                                                          | < .0001 | 100                                 |
| Intraoperative cryoprecipitate, units                                                          | 0 [0, 0]                                                                               | 0 [0, 0]                                                                          | 0 [0, 0]                                                                          | < .0001 | 100                                 |
| Total urine output, liter                                                                      | 1.9 $\pm$ 1.2                                                                          | 1.9 $\pm$ 1.1                                                                     | 1.9 $\pm$ 1.4                                                                     | 0.4361  | 99.1                                |
| Pre-CPB ventilation/respiratory parameters                                                     |                                                                                        |                                                                                   |                                                                                   |         |                                     |
| Tidal volume, ml/kg predicted body weight                                                      | 7.8 $\pm$ 1.5                                                                          | 7.8 $\pm$ 1.5                                                                     | 8.1 $\pm$ 1.7                                                                     | 0.0001  | 100                                 |
| Peak inspiratory pressure, cm H <sub>2</sub> O                                                 | 17 [15, 20]                                                                            | 17 [15, 20]                                                                       | 19 [16, 22]                                                                       | < .0001 | 100                                 |
| Positive end-expiratory pressure, cm H <sub>2</sub> O                                          | 5 [4, 5]                                                                               | 5 [4, 5]                                                                          | 5 [2, 5]                                                                          | 0.0359  | 100                                 |
| Driving pressure, cm H <sub>2</sub> O                                                          | 13 [11, 16]                                                                            | 13 [11, 16]                                                                       | 15 [12, 18]                                                                       | < .0001 | 100                                 |
| SpO <sub>2</sub> , %                                                                           | 99 [98, 100]                                                                           | 99 [98, 100]                                                                      | 99 [99, 100]                                                                      | < .0001 | 100                                 |
| Inspired FiO <sub>2</sub> , %                                                                  | 97 [96, 98]                                                                            | 97 [95, 98]                                                                       | 97 [96, 98]                                                                       | < .0001 | 100                                 |
| Post-CPB ventilation/respiratory parameters                                                    |                                                                                        |                                                                                   |                                                                                   |         |                                     |
| Tidal volume, ml/kg predicted body weight                                                      | 7.8 $\pm$ 1.5                                                                          | 7.7 $\pm$ 1.4                                                                     | 8.1 $\pm$ 1.6                                                                     | < .0001 | 100                                 |
| Peak inspiratory pressure, cm H <sub>2</sub> O                                                 | 18 [15, 20]                                                                            | 17 [15, 20]                                                                       | 20 [17, 23]                                                                       | < .0001 | 100                                 |
| Positive end-expiratory pressure, cm H <sub>2</sub> O                                          | 5 [4, 5]                                                                               | 5 [4, 5]                                                                          | 5 [4, 5]                                                                          | 0.7216  | 100                                 |
| Driving pressure, cm H <sub>2</sub> O                                                          | 13 [11, 16]                                                                            | 13 [11, 16]                                                                       | 16 [13, 19]                                                                       | < .0001 | 100                                 |
| SpO <sub>2</sub> , %                                                                           | 100 [99, 100]                                                                          | 100 [99, 100]                                                                     | 100 [98, 100]                                                                     | 0.4913  | 100                                 |
| Inspired FiO <sub>2</sub> , %                                                                  | 97 [96, 98]                                                                            | 97.0 [96, 98]                                                                     | 97 [96, 98]                                                                       | 0.0033  | 100                                 |
| Overall ventilation                                                                            |                                                                                        |                                                                                   |                                                                                   |         |                                     |
| Bundled LPV strategy**                                                                         | 1,913 $\pm$ 40.8                                                                       | 1,787 $\pm$ 42.7                                                                  | 126 $\pm$ 24.6                                                                    | < .0001 | 100                                 |

P value from independent *t* test, Mann-Whitney *U* test, or chi-square test, as appropriate.

\*Defined by chronic lung disease at or above moderate or bronchodilator therapy within STS; or COPD at or above moderate on preoperative anesthesia history and physical. †Defined by functional capacity – Low (at or below four metabolic equivalents of task) on preoperative anesthesia history and physical. ‡Defined via STS as a history of any of the following: atrial fibrillation, atrial flutter, third degree heart block, ventricular fibrillation, or ventricular tachycardia. §Calculated using the Chronic Kidney Disease – Epidemiology Collaboration equation. ¶Defined as the frequency of primary anesthesiology attending using a bundled LPV strategy, as a proportion of all cardiac cases performed by the anesthesiology attending among the study population, transformed into tertiles. ||Defined as intraoperative administration of furosemide, bumetanide, or mannitol. \*\*Defined as intraoperative median values of tidal volume less than 8 ml/kg predicted body weight, positive end-expiratory pressure at or above 5 cm H<sub>2</sub>O, and driving pressure less than 16 cm H<sub>2</sub>O.

ASA, American Society of Anesthesiologists; CABG, coronary artery bypass graft; CPB, cardiopulmonary bypass; FiO<sub>2</sub>, fraction of inspired oxygen; LPV, lung-protective ventilation; PA, pulmonary artery; SpO<sub>2</sub>, oxygen saturation measured by pulse oximetry; STS, Society of Thoracic Surgeons.

the postoperative pulmonary complication primary outcome, we performed several sensitivity analyses, including an analysis of lung-protective ventilation separated into component parts:  $V_T$  below 8 ml/kg predicted body weight, driving pressure below 16 cm H<sub>2</sub>O, or PEEP at or above 5 cm H<sub>2</sub>O, and analysis of lung-protective ventilation strategies separately examined before and after CPB.

We also performed a sensitivity analysis, using a model that further restricted the number of covariates to the number of outcomes divided by 20.<sup>45</sup> Additionally, we compared our multivariable postoperative pulmonary complication model developed using least absolute shrinkage and selection operator for covariate selection with a multivariable postoperative pulmonary complication model including all noncollinear covariates with *P* less than 0.10. Finally, we performed subgroup analyses stratified by salient clinical characteristics.

## Results

Of the 5,365 cardiac surgical cases reviewed, 4,694 met study inclusion criteria (fig. 1). Among these cases, 513 (10.9%) experienced a postoperative pulmonary complication. Individual nonmutually exclusive components of postoperative pulmonary complications included pneumonia (121 cases, 23.6% of postoperative pulmonary complications), prolonged ventilation longer than 24 h, (302, 58.9% of postoperative pulmonary complications), reintubation (115, 22.4% of postoperative pulmonary complications), and PaO<sub>2</sub>/Fio<sub>2</sub> below 100 mmHg (164, 32.0% of postoperative pulmonary complications).

## Patient Population – Baseline Characteristics and Univariate Analyses

As described in table 1, our study population had a median age of 62 yr, and 64% were men. Cardiac surgeries performed included coronary artery bypass grafting (20.6%), valve (44.3%), aorta (2.1%), and combination (33.0%). Cases were primarily elective (79.7%); remaining cases were urgent (20.3%). Our study population included cases across four time partitions by Society of Thoracic Surgeons Adult Cardiac Surgery Database version, including 349 (7.4%) from 1/1/2006 to 12/31/2007; 1,286 (27.4%) 1/1/2008 to 6/30/2011; 1,679 (35.8%) 7/1/2011 to 6/30/2014; 1,380 (29.4%) 7/1/2014 to 5/31/2017. An overall lung-protective ventilation strategy was used in 1,913 cases (40.8%); among components of a lung-protective ventilation strategy, a  $V_T$  below 8 ml/kg predicted body weight was achieved in 64% of cases, modified driving pressure below 16 cm H<sub>2</sub>O in 71% of cases, and PEEP at or above 5 cm H<sub>2</sub>O in 63% of cases. Adherence to varying thresholds and independent associations with postoperative pulmonary complications are provided in Supplemental Digital Content 1A through 1C (<http://links.lww.com/ALN/C26>). Crude incidence of postoperative pulmonary complications among cases using an overall lung-protective ventilation strategy was 6.6%,

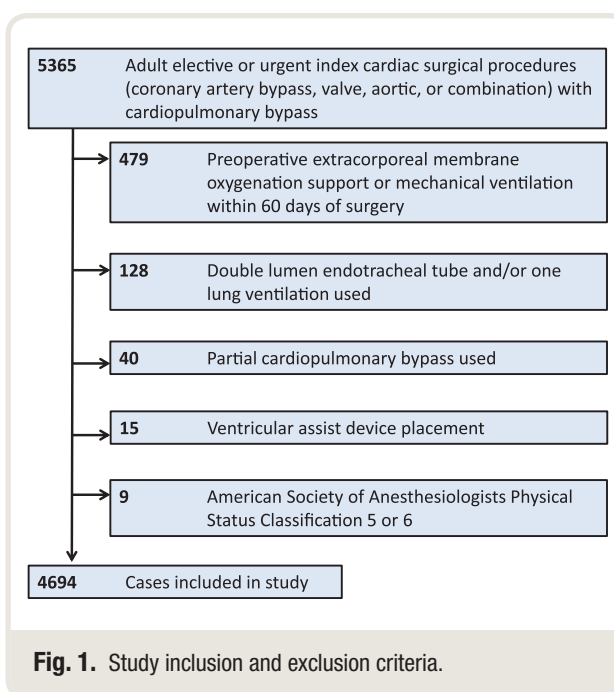

Fig. 1. Study inclusion and exclusion criteria.

compared with 13.9% among cases without an overall lung-protective ventilation strategy (table 2). Postoperative pulmonary complications were associated with increased postoperative mortality as well as longer postoperative mechanical ventilation, ICU stay, and hospital stay (table 3). Patients receiving a lung-protective ventilation strategy were more commonly tall, nonobese, male, and nonsmokers (Supplemental Digital Content 2, <http://links.lww.com/ALN/C27>).

## Intraoperative Ventilator Management

Patients were ventilated with a cohort mean  $\pm$  SD  $V_T$  of 7.8  $\pm$  1.5 ml/kg predicted body weight, median (interquartile range) driving pressure of 13 (11 to 16) cm H<sub>2</sub>O, and PEEP of 5 (4 to 5) cm H<sub>2</sub>O. Compared with pre-CPB ventilator parameters, we observed no significant differences in post-CPB parameters (table 1). We observed distributions of overall per-case median ventilator parameters to be unimodal and rightward-skewed for  $V_T$  and driving pressure, versus a bimodal distribution (0 cm H<sub>2</sub>O and 5 cm H<sub>2</sub>O) for PEEP (fig. 2). Over the study period, we observed significant linear trends in ventilation practices: providers used decreasing  $V_T$  and driving pressure, and increasingly used PEEP (*P* < 0.001 for all trends; fig. 3).

## Impact of Ventilator Parameters–Multivariable Analyses

Of the 4,694 cases studied, we observed data completeness rates greater than 99% for all but two risk adjustment variables, preoperative respiratory rate (97.0%) and total intraoperative crystalloid (98.8%). Peak inspiratory pressure and weight were removed from the model due to

**Table 2.** Summary of Primary Study Outcomes, Primary Outcome Components, and Bundled Lung-protective Ventilation Strategy

|                                                | Entire Cohort<br>N = 4694 | Bundled LPV Strategy*   |                          | P Value |
|------------------------------------------------|---------------------------|-------------------------|--------------------------|---------|
|                                                |                           | No, 59.3%<br>(n = 2781) | Yes, 40.7%<br>(n = 1913) |         |
| Postoperative pulmonary complication           | 513 (10.9)                | 387 (13.9)              | 126 (6.6)                | < .0001 |
| Pneumonia                                      | 121 (2.6)                 | 99 (3.6)                | 22 (1.2)                 | < .0001 |
| Prolonged postoperative ventilation†           | 302 (6.4)                 | 226 (8.1)               | 76 (4.0)                 | < .0001 |
| Reintubation                                   | 115 (2.6)                 | 85 (3.5)                | 30 (1.6)                 | < .0001 |
| PaO <sub>2</sub> /Fio <sub>2</sub> < 100 mmHg‡ | 164 (3.8)                 | 131 (5.2)               | 33 (1.9)                 | < .0001 |

P value from independent *t* test or chi-square test, as appropriate.

\*Defined as intraoperative median values of below 8 ml/kg predicted body weight, positive end-expiratory pressure at or above 5 cm H<sub>2</sub>O, and driving pressure below 16 cm H<sub>2</sub>O.

†Defined as initial postoperative mechanical ventilation more than 24 h. ‡Within 48 h postoperatively while intubated.

Fio<sub>2</sub>, fraction of inspired oxygen; LPV, lung-protective ventilation; PaO<sub>2</sub>, arterial partial pressure of oxygen.

**Table 3.** Summary of Primary Study Outcomes, Secondary Study Outcomes, and Bundled Lung-protective Ventilation Strategy

|                                     | Entire Cohort<br>N = 4,694 | Postoperative Pulmonary Complication |                         |         | Bundled LPV Strategy*   |                          |         |
|-------------------------------------|----------------------------|--------------------------------------|-------------------------|---------|-------------------------|--------------------------|---------|
|                                     |                            | No, 89.1%<br>(n = 4,181)             | Yes, 10.9%<br>(n = 513) | P Value | No, 59.3%<br>(n = 2781) | Yes, 40.7%<br>(n = 1913) | P Value |
| 30-day postoperative mortality      | 49 (1.0)                   | 19 (0.5)                             | 30 (5.9)                | < .0001 | 35 (1.3)                | 14 (0.7)                 | 0.0810  |
| Postoperative durations             |                            |                                      |                         |         |                         |                          |         |
| Total postoperative ventilator, h   | 17.2 (77.3)                | 7.1 (5.2)                            | 99.4 (216.5)            | < .0001 | 21.5 (96.1)             | 10.9 (34.3)              | < .0001 |
| Total ICU, h                        | 73.9 (115.0)               | 57.6 (51.6)                          | 207.1 (282.1)           | < .0001 | 79.7 (137.6)            | 65.4 (69.3)              | < .0001 |
| Total hospital length of stay, days | 7.5 (6.7)                  | 6.5 (3.9)                            | 15.7 (14.4)             | < .0001 | 8.1 (7.8)               | 6.7 (4.4)                | < .0001 |

P value from independent *t* test or chi-square test, as appropriate.

\*Defined as intraoperative median values of below 8 ml/kg predicted body weight, positive end-expiratory pressure at or above 5 cm H<sub>2</sub>O, and driving pressure below 16 cm H<sub>2</sub>O.

ICU, intensive care unit; LPV, lung-protective ventilation.

multicollinearity (variance inflation factor greater than 10). Platelet count, international normalized ratio, total intraoperative opioid, preoperative respiratory rate, and history of cancer were removed, given a lack of use in previous validated cardiac surgery or postoperative pulmonary complication risk score models.<sup>9,10,43</sup> Multiple additional variables were removed via least absolute shrinkage and selection operator (denoted by “—” in Supplemental Digital Content 3, <http://links.lww.com/ALN/C28>). Through multivariable analyses adjusting for postoperative pulmonary complication risk factors, an intraoperative lung-protective ventilation bundle was independently associated with reduced postoperative pulmonary complications (adjusted odds ratio, 0.56; 95% CI, 0.42–0.75, figs. 4 and 5). Modelling lung-protective ventilation exposure as a treatment, we observed a number needed to expose of 18 (95% CI, 14–33) to prevent one postoperative pulmonary complication.

We observed no associations between a lung-protective ventilation bundle and minimum postoperative PaO<sub>2</sub>/Fio<sub>2</sub> while intubated, initial postoperative ventilator duration in hours, length of ICU stay in hours, or length of hospital stay in days (Supplemental Digital Content 4,

<http://links.lww.com/ALN/C29>). We observed similar findings for logarithmically transformed secondary outcomes. Postoperative mortality occurred in 49 cases (1.0%); our study was not adequately powered to analyze independent associations between lung-protective ventilation and mortality.

Among individual pulmonary complications (pneumonia, prolonged ventilation longer than 24 h, reintubation, and PaO<sub>2</sub>/Fio<sub>2</sub> less than 100 mmHg postoperatively while intubated), a lung-protective ventilation bundle demonstrated univariate associations across all postoperative pulmonary complication components; after multivariable adjustment, a lung-protective ventilation bundle remained protective against all postoperative pulmonary complication components except for prolonged ventilation longer than 24 h (Supplemental Digital Content 5, <http://links.lww.com/ALN/C30>, and Supplemental Digital Content 6, <http://links.lww.com/ALN/C31>).

### Sensitivity Analyses

When analyzing each component of the lung-protective ventilation bundle separately, we found that modified



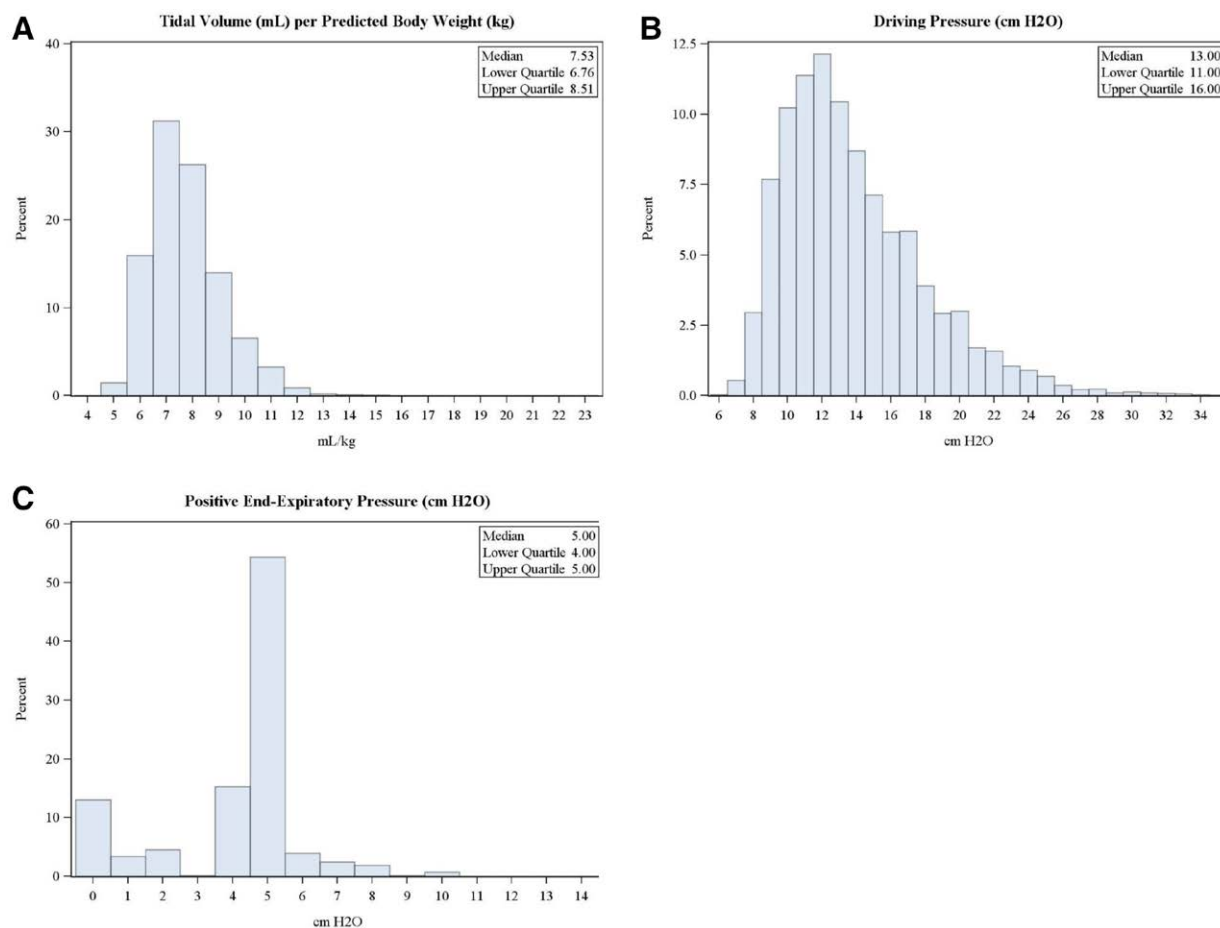

**Fig. 2.** Frequency distributions of per-case median intraoperative ventilator parameters, including tidal volume per predicted body weight, modified driving pressure, and positive end-expiratory pressure (in A, B, and C, respectively).

driving pressure less than 16 cm H<sub>2</sub>O was independently associated with reduced postoperative pulmonary complications (adjusted odds ratio, 0.51; 95% CI, 0.39–0.66) whereas  $V_T$  below 8 ml/kg predicted body weight and PEEP at or above 5 cm H<sub>2</sub>O did not demonstrate significant independent associations (adjusted odds ratios [95% CIs] 0.99 [0.75–1.30] and 1.18 [0.91–1.53], respectively; fig. 4). Furthermore, driving pressure less than 16 cm H<sub>2</sub>O was independently associated with improvements in all secondary outcomes.

When analyzing the lung-protective ventilation bundle as partitioned into pre-CPB and post-CPB periods, we observed no collinearity between corresponding pre-CPB and post-CPB variables (variance inflation factors below 10) and thus included all variables into a single model. We found that adherence to the post-CPB lung-protective ventilation bundle was associated with less postoperative pulmonary complications (adjusted odds ratio, 0.53; 95% CI, 0.38–0.74) whereas the pre-CPB lung-protective

ventilation bundle was not associated with postoperative pulmonary complications (adjusted odds ratio, 1.19; 95% CI, 0.84–1.68, Supplemental Digital Content 7, <http://links.lww.com/ALN/C32>). Similarly, when analyzing the lung-protective ventilation components individually partitioned into pre-CPB and post-CPB periods, we observed no collinearity between corresponding pre-CPB and post-CPB components and thus included all variables into a single model. We observed post-CPB driving pressure less than 16 cm H<sub>2</sub>O was associated with lesser likelihood of postoperative pulmonary complication (adjusted odds ratio, 0.57; 95% CI, 0.42–0.78), but neither the pre-CPB driving pressure below 16 cm H<sub>2</sub>O (adjusted odds ratio, 0.77; 95% CI, 0.56–1.07) nor  $V_T$  below 8 ml/kg predicted body weight nor PEEP at or above 5 cm H<sub>2</sub>O pre-CPB and post-CPB components was associated with postoperative pulmonary complications.

Logistic regression models using either least absolute shrinkage and selection of operator restricted to 24

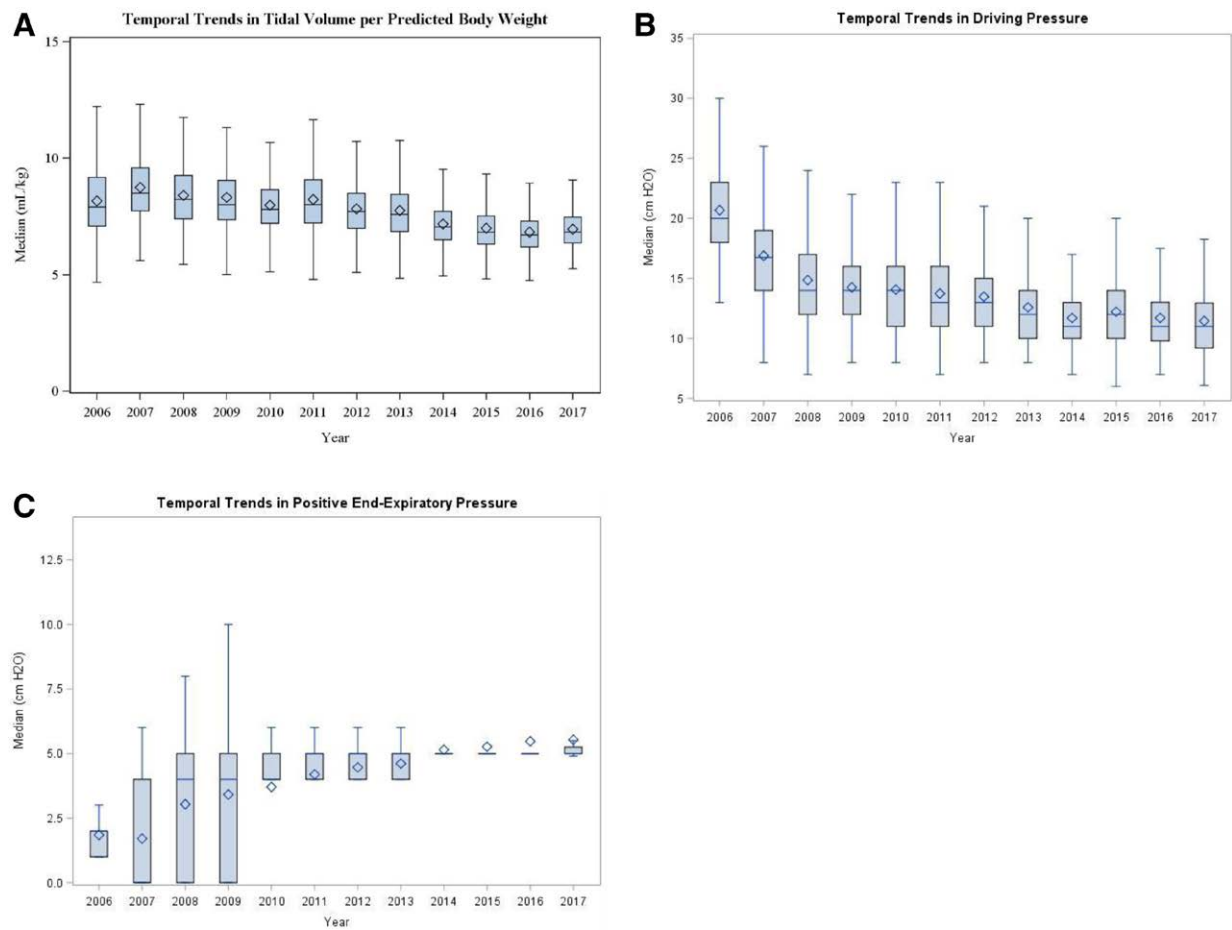

**Fig. 3.** Temporal trends in intraoperative ventilator strategies, including tidal volume per predicted body weight, modified driving pressure, and positive end-expiratory pressure (in A, B, and C, respectively).

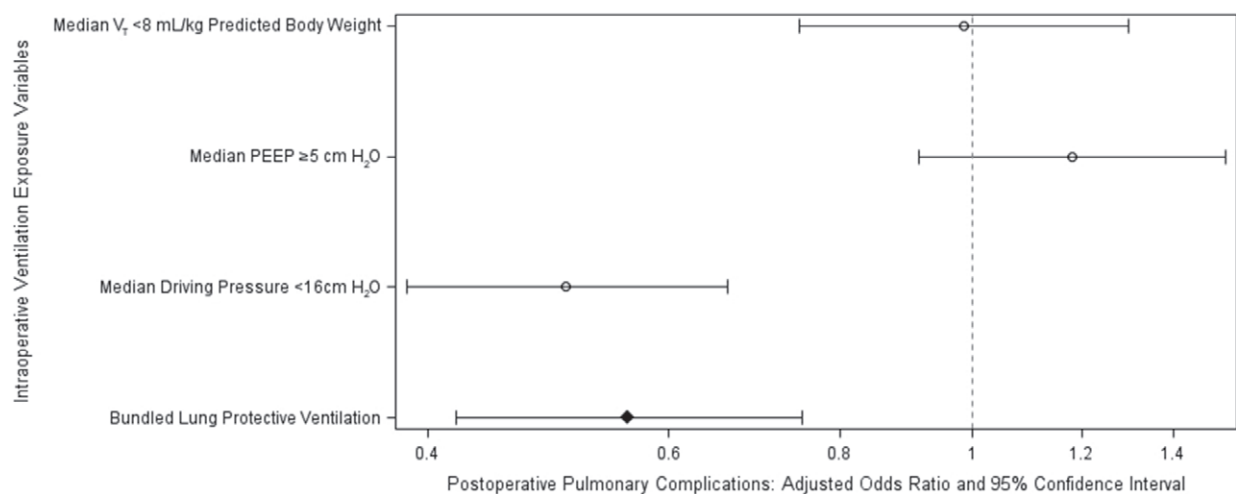

**Fig. 4.** Independent associations between intraoperative lung protective ventilation strategies and postoperative pulmonary complications.

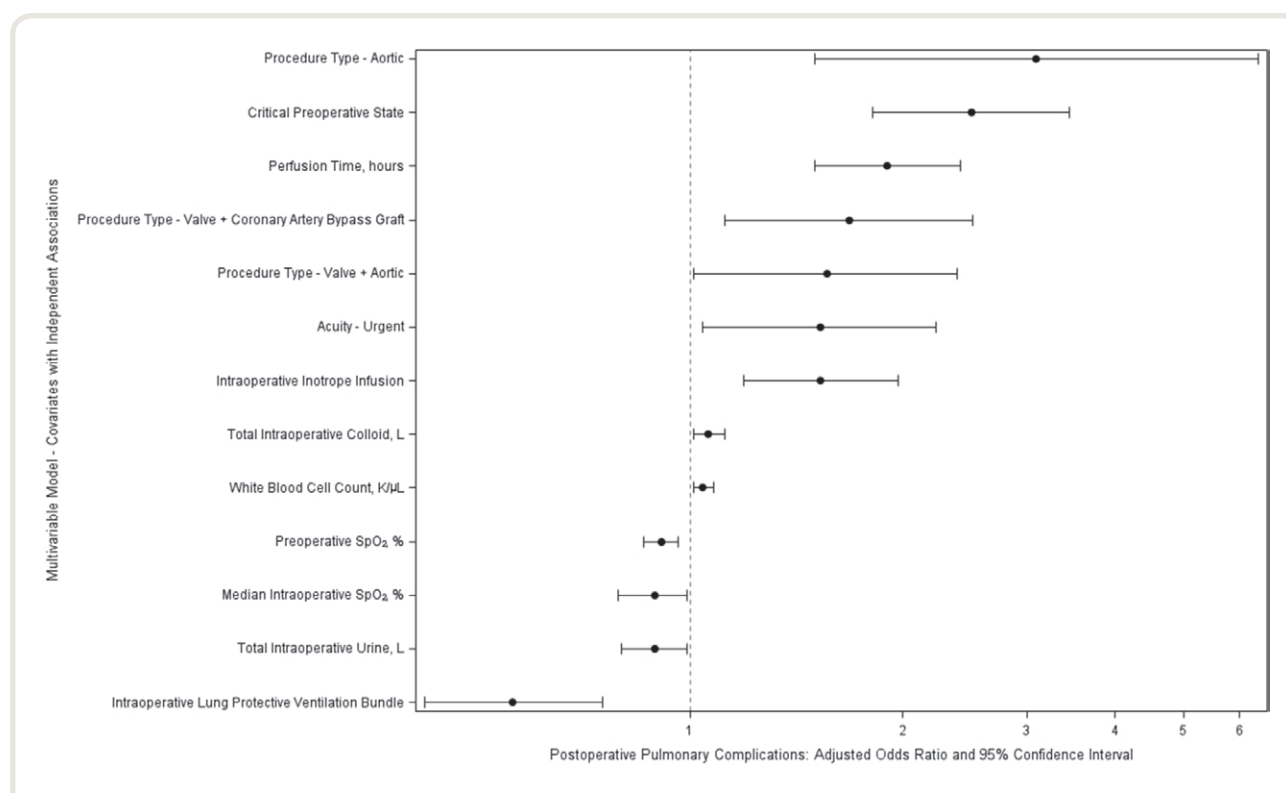

**Fig. 5.** Significant independent associations between multivariable model components and postoperative pulmonary complications.

covariates, or forward selection of univariate association thresholds ( $P < 0.10$ ) found independent associations between lung-protective ventilation, driving pressure, and postoperative pulmonary complications, but not  $V_T$  or PEEP (Supplemental Digital Content 8, <http://links.lww.com/ALN/C33>, and Supplemental Digital Content 9, <http://links.lww.com/ALN/C34>). Finally, sensitivity analyses of clinically important subgroups yielded similar independent associations between the lung-protective ventilation bundle and outcomes. The protective association of the lung-protective ventilation bundle was observed in both males and females, in elective but not urgent cases, across all body mass index ranges, only in patients without chronic lung disease, and in patients undergoing valve procedures (Supplemental Digital Content 10, <http://links.lww.com/ALN/C35>).

## Discussion

Using robust, validated observational databases, we report an overall pulmonary complication incidence of 10.9% after cardiac surgery, and identify an intraoperative lung-protective ventilation bundle as independently associated with a clinically and statistically significant reduction in pulmonary complications. Our study builds on existing literature by providing an analysis of the impact of intraoperative ventilation strategies on postoperative outcomes among a generalizable cardiac surgery population. Although unaccounted for in current risk scoring systems, we report that

an intraoperative lung-protective ventilation strategy is independently associated with development of postoperative pulmonary complications. Through a sensitivity analysis evaluating components of the lung-protective ventilation bundle, we importantly note that driving pressure, but not  $V_T$  or PEEP, is independently associated with postoperative pulmonary complications.

Compared with previous literature, our findings demonstrate the importance of considering multiple components of lung-protective ventilation when evaluating the impact of mechanical ventilation on outcomes. Notably, we observed that not all components of lung-protective ventilation were independently associated with decreased postoperative pulmonary complications; however, a lung-protective ventilation bundled approach was independently associated with decreased postoperative pulmonary complications. Furthermore, within the lung-protective ventilation bundle studied, we observed driving pressure as the component primarily driving the association with reduced postoperative pulmonary complications, rather than  $V_T$  or PEEP. These findings offer insight toward sustaining a trend of expedited recovery from cardiac surgery, a process in which postoperative care teams are increasingly reliant on intraoperative practices—such as lung-protective ventilation—to target reduced postoperative complications and to safely enable rapid de-escalation of care on arrival to the ICU.<sup>46,47</sup>

Our study highlights the importance of driving pressure, and conversely the limitations of  $V_T$  and PEEP, as independently associated with postoperative pulmonary complications and secondary outcomes. We offer two hypotheses to explain these findings: (1) increased driving pressure is a marker for noncompliant lungs, assuming such patients are at increased risk of postoperative pulmonary complications and remain unidentified by model covariates; or (2) increased driving pressure reflects direct pulmonary injury via barotrauma as a postoperative pulmonary complication mechanism. Countervailing to a hypothesis that driving pressure serves as a marker for noncompliance, however, was our observation that lower  $V_T$  was not independently associated with increased postoperative pulmonary complications, as would be the case for increasingly noncompliant lungs at a given constant driving pressure exposure (controlled covariate). This finding was similarly observed in an analysis performed among 3,562 patients with acute respiratory distress syndrome enrolled across nine randomized trials.<sup>17</sup> Within a surgical population, a recent randomized, controlled trial demonstrated a driving pressure-guided ventilation strategy during one-lung ventilation to be similarly associated with a lower incidence of postoperative pulmonary complications compared with conventional ventilation strategies, during thoracic surgery.<sup>48</sup>

Additionally of note, in a sensitivity analysis analyzing pre-CPB driving pressure and post-CPB driving pressure separately, our observations that (1) pre-CPB and post-CPB variables were not collinear and (2) post-CPB driving pressure but not pre-CPB driving pressure below 16 cm  $H_2O$  was independently associated with postoperative pulmonary complications, suggests our driving pressure findings cannot solely be explained as a marker for poor baseline lung function. However, whether this independent association between post-CPB driving pressure below 16 cm  $H_2O$  and postoperative pulmonary complications can be explained by a direct lung injury hypothesis, *versus* a marker for varying degrees of CPB-induced pulmonary dysfunction, remains unanswerable based on our data. Other explanations for a lack of collinearity between pre-CPB and post-CPB driving pressure may include nuanced surgery stage-specific ventilation strategies, such as low  $V_T$  and low driving pressure during internal mammary artery surgical dissection and/or cannulation before CPB. Finally, although a driving pressure threshold below 16 cm  $H_2O$  enabled class balance between cases adherent *versus* nonadherent to an overall lung-protective ventilation bundle, an optimal driving pressure threshold defining lung-protective ventilation remains unclear, and likely varies by clinical context.

Our findings that lower intraoperative driving pressure was associated with improved outcomes suggest an opportunity for improved care through the implementation of an lung-protective ventilation protocol favoring lower driving pressure. Additionally, our observation that intraoperative

driving pressure, but not  $V_T$  or PEEP, was independently associated with postoperative pulmonary complications, reflects a potential benefit of individualized ventilation strategies among patients with varying respiratory compliance (ignored with  $V_T$ -targeted ventilator management) or varying volume of aerated functional lung (ignored with uniform application of PEEP). However, given the observational nature of this study, our findings require prospective interventional evaluation and validation before large-scale adoption of the technique.

Our 10.9% observed incidence of postoperative pulmonary complications is consistent with previous studies.<sup>1,6</sup> However, this comparison is challenged by varied definitions of a postoperative pulmonary complication, which remain subject to debate. Our postoperative pulmonary complication definition is consistent with international consensus guidelines<sup>35,36</sup> and was derived from clinician-adjudicated data available within the Society of Thoracic Surgeons database or our electronic health record. Nonetheless, other recognized components of postoperative pulmonary complications include (1) atelectasis defined by radiographic evidence,<sup>35</sup> (2) pulmonary aspiration defined by clinical history and radiographic evidence,<sup>35</sup> (3) pleural effusion defined by radiographic evidence,<sup>36</sup> (4) pneumothorax,<sup>35</sup> (5) bronchospasm defined by expiratory wheezing treated with bronchodilators,<sup>36</sup> or (6) aspiration pneumonitis.<sup>36</sup> We determined *a priori* to exclude these additional postoperative pulmonary complication components in our composite outcome on the basis of either unclear clinical significance in a cardiac surgical population, underlying mechanisms likely not amenable to treatment via lung-protective ventilation, or lack of access to component-specific high-fidelity data across all patients in the study cohort.

## Study Limitations

Our study has several limitations. First, we were unable to account for all potential mechanisms leading to a composite postoperative pulmonary complication. Mechanisms for pulmonary injury after cardiac surgery are multifactorial.<sup>7</sup> In our study, we investigated lung-protective ventilation as a means to reduce ventilator-induced lung injury, leading to postoperative pulmonary complications through mechanisms including volutrauma, barotrauma, and atelectasis, and respectively mitigated by lower  $V_T$ , lower driving pressure, and application of PEEP.<sup>8</sup> However, additional postoperative pulmonary complication mechanisms to be targeted by anesthesiologists include (1) pulmonary edema, mitigated by fluid and transfusion management,<sup>49</sup> (2) inadequate respiratory effort, mitigated by monitoring/reversal of neuromuscular blockade<sup>50,51</sup> or rapid-acting, opioid-limiting anesthetic agents,<sup>52</sup> and (3) respiratory infection, mitigated by ventilator associated pneumonia prevention bundles.<sup>53,54</sup> In our study, we successfully accounted for several of these targets as covariates. However, the relative importance of each technique, and the impact of lung-protective



ventilation on the association between such techniques and postoperative pulmonary complications, remains beyond the scope of this study.

In our study, precise times for sternotomy and chest closure were unavailable; however, cases excluded redo-sternotomies with protracted closed chest times. As such, driving pressures were assessed during open-chest conditions for a majority of intraoperative ventilation. Our study adds new data to studies of protective ventilation, previously performed during closed-chest conditions. As this relates to the driving pressures observed, our study may demonstrate comparatively less bias introduced by variable chest wall compliance. Thus, airway driving pressure in this study is likely to more closely reflect actual transpulmonary driving pressure, a determinant of dynamic lung strain.<sup>55</sup> Despite this strength, we caution generalizing our findings to more commonly studied patient populations ventilated under closed-chest conditions. We additionally caution generalizing our driving pressure threshold below 16 cm H<sub>2</sub>O as lung-protective ventilation without consideration of clinical context. In previous studies of cardiac surgical populations,<sup>16,37</sup> thresholds for lung-protective ventilation defined by driving pressure (plateau pressure – PEEP) ranged from 8 to 19 cm H<sub>2</sub>O. Such variation may be explained by (1) time of measurement (*e.g.*, intraoperative *versus* postoperative), (2) surgical conditions (*e.g.*, closed-chest *versus* open-chest), (3) patient populations and practice patterns varying by year and institution, and (4) covariates used for multivariable adjustment. However, it should be noted that despite such sources of variation influencing driving pressure-based lung-protective ventilation thresholds, independent associations between increased ventilator driving pressures and increased postoperative complications have been consistently observed.

Additional limitations to our study include those inherent to our single-center, observational study design: our conclusions require prospective multicenter validation. Patients receiving a lung-protective ventilation bundle were non-random; although multiple covariates associated with the lung-protective ventilation exposure were accounted for via multivariable analyses, unmeasured confounders influencing receiving a lung-protective ventilation bundle and impacting our postoperative pulmonary complication primary outcome was a source of potential bias. As pertaining to our lung-protective ventilation exposure variable, limitations included a lack of formal  $P_{\text{plat}}$  ventilator data for more accurate characterization of driving pressure. Although differences between ventilator peak inspiratory pressure and  $P_{\text{plat}}$  may be approximated in specified circumstances, the availability of all data necessary for calculations—and the degree to which confounding factors may bias such calculations (*e.g.*, patient differences in airway resistance, endotracheal tube obstructions from kinking/secretions, and the use of end-inspiratory pressure to approximate inspiratory pause pressure for calculating true  $P_{\text{plat}}$ )—remain beyond the scope of our study.

Consistent with existing literature,<sup>1,28</sup> we represented the intraoperative period using lung-protective ventilation exposure median values—potentially failing to account for brief periods of profoundly injurious ventilation. Finally, although our study goal was to specifically examine relationships between intraoperative ventilation and postoperative pulmonary complications, relationships between postoperative ventilation and postoperative pulmonary complications were not studied.

## Conclusions

Despite limitations, our study advances understanding of the relationship between intraoperative lung-protective ventilation and impact on costly, life-threatening postoperative pulmonary complication outcomes. In summary, we describe a 10.9% incidence of postoperative pulmonary complications among adults undergoing cardiac surgery. Importantly, we observed that a bundled lung-protective ventilation strategy was independently associated with a lower likelihood of postoperative pulmonary complications and that this was mostly associated with lower driving pressure. Through robust capture of variables describing intraoperative anesthesia management for cardiac surgery patients, our study provides data which may better inform postoperative pulmonary complication multivariable models in this population. Additionally, our findings offer targets for future prospective trials investigating the impact of specific lung-protective ventilation strategies for improving cardiac surgery outcomes.

## Acknowledgments

The authors acknowledge Tomas Medina Inchauste, B.S.E., and Anik Sinha, M.S. (Department of Anesthesiology, University of Michigan Medical School, Ann Arbor, Michigan) and Jeremy Wolverton, M.S. (Department of Cardiac Surgery, University of Michigan Medical School, Ann Arbor, Michigan) for their contributions in data acquisition and electronic search query programming for this project.

## Research Support

All work and partial funding attributed to the Department of Anesthesiology, University of Michigan Medical School (Ann Arbor, Michigan). The project was supported in part by grant No. 2446-PIRAP from the Blue Cross Blue Shield of Michigan Foundation (Detroit, Michigan). Additionally, the project was supported in part by grant No. T32-GM103730-04 from the National Institute of General Medicine Sciences, (Bethesda, Maryland). Dr. Likosky received support (R01-HS-022535) from the Agency for Healthcare Research and Quality (Rockville, Maryland). Dr. Strobel received support (TL1-TR-002242) from the Michigan Institute for Clinical and Health Research (Ann Arbor, Michigan). The content is solely the responsibility of

the authors and does not necessarily represent the official views of the National Institutes of Health, Blue Cross Blue Shield of Michigan Foundation, or Agency for Healthcare Research and Quality.

### Competing Interests

The authors declare no competing interests beyond those described in the funding statement.

### Correspondence

Address correspondence to Dr. Mathis: Department of Anesthesiology, University of Michigan, 1H247 UH, SPC 5048, 1500 East Medical Center Drive, Ann Arbor, Michigan 48109-5048. mathism@med.umich.edu. Information on purchasing reprints may be found at [www.anesthesiology.org](http://www.anesthesiology.org) or on the masthead page at the beginning of this issue. ANESTHESIOLOGY's articles are made freely accessible to all readers, for personal use only, 6 months from the cover date of the issue.

### References

- Zochios V, Klein AA, Gao F: Protective invasive ventilation in cardiac surgery: A systematic review with a focus on acute lung injury in adult cardiac surgical patients. *J Cardiothorac Vasc Anesth* 2018; 32:1922–36
- Ibañez J, Riera M, Amezcua R, Herrero J, Colomar A, Campillo-Artero C, de Ibarra JI, Bonnin O: Long-term mortality after pneumonia in cardiac surgery patients: A propensity-matched analysis. *J Intensive Care Med* 2016; 31:34–40
- Brown PP, Kugelmass AD, Cohen DJ, Reynolds MR, Culler SD, Dee AD, Simon AW: The frequency and cost of complications associated with coronary artery bypass grafting surgery: Results from the United States Medicare program. *Ann Thorac Surg* 2008; 85:1980–6
- García-Delgado M, Navarrete-Sánchez I, Colmenero M: Preventing and managing perioperative pulmonary complications following cardiac surgery. *Curr Opin Anaesthesiol* 2014; 27:146–52
- Lellouche F, Delorme M, Bussièrès J, Ouattara A: Perioperative ventilatory strategies in cardiac surgery. *Best Pract Res Clin Anaesthesiol* 2015; 29:381–95
- Hulzebos EH, Helder PJ, Favié NJ, De Bie RA, Brutel de la Rivière A, Van Meeteren NL: Preoperative intensive inspiratory muscle training to prevent postoperative pulmonary complications in high-risk patients undergoing CABG surgery: A randomized clinical trial. *JAMA* 2006; 296:1851–7
- Apostolakis E, Filos KS, Koletsis E, Dougenis D: Lung dysfunction following cardiopulmonary bypass. *J Card Surg* 2010; 25:47–55
- Slinger P, Kilpatrick B: Perioperative lung protection strategies in cardiothoracic anesthesia: Are they useful? *Anesthesiol Clin* 2012; 30:607–28
- Canet J, Gallart L, Gomar C, Paluzie G, Vallès J, Castillo J, Sabaté S, Mazo V, Briones Z, Sanchis J; ARISCAT Group: Prediction of postoperative pulmonary complications in a population-based surgical cohort. *ANESTHESIOLOGY* 2010; 113:1338–50
- Shroyer AL, Coombs LP, Peterson ED, Eiken MC, DeLong ER, Chen A, Ferguson TB Jr, Grover FL, Edwards FH: The Society of Thoracic Surgeons: 30-day operative mortality and morbidity risk models. *Ann Thorac Surg* 2003; 75:1856–64; discussion 1864–5
- Brescia AA, Rankin JS, Cyr DD, Jacobs JP, Prager RL, Zhang M, Matsouaka RA, Harrington SD, Dokholyan RS, Bolling SF, Fishstrom A, Pasquali SK, Shahian DM, Likosky DS; Michigan Society of Thoracic and Cardiovascular Surgeons Quality Collaborative: Determinants of variation in pneumonia rates after coronary artery bypass grafting. *Ann Thorac Surg* 2018; 105:513–20
- Gu WJ, Wang F, Liu JC: Effect of lung-protective ventilation with lower tidal volumes on clinical outcomes among patients undergoing surgery: A meta-analysis of randomized controlled trials. *CMAJ* 2015; 187:E101–9
- Güldner A, Kiss T, Serpa Neto A, Hemmes SN, Canet J, Spieth PM, Rocco PR, Schultz MJ, Pelosi P, Gama de Abreu M: Intraoperative protective mechanical ventilation for prevention of postoperative pulmonary complications: A comprehensive review of the role of tidal volume, positive end-expiratory pressure, and lung recruitment maneuvers. *ANESTHESIOLOGY* 2015; 123:692–713
- Guay J, Ochroch EA: Intraoperative use of low volume ventilation to decrease postoperative mortality, mechanical ventilation, lengths of stay and lung injury in patients without acute lung injury. *Cochrane Database Syst Rev* 2015:CD011151
- Serpa Neto A, Hemmes SN, Barbas CS, Beiderlinden M, Biehl M, Binnekade JM, Canet J, Fernandez-Bustamante A, Futier E, Gajic O, Hedenstierna G, Hollmann MW, Jaber S, Kozian A, Licker M, Lin WQ, Maslow AD, Memtsoudis SG, Reis Miranda D, Moine P, Ng T, Paparella D, Putensen C, Ranieri M, Scavonetto F, Schilling T, Schmid W, Selmo G, Severgnini P, Sprung J, Sundar S, Talmor D, Treschan T, Unzueta C, Weingarten TN, Wolthuis EK, Wrigge H, Gama de Abreu M, Pelosi P, Schultz MJ; PROVE Network Investigators: Protective versus conventional ventilation for surgery: A systematic review and individual patient data meta-analysis. *ANESTHESIOLOGY* 2015; 123:66–78
- Neto AS, Hemmes SN, Barbas CS, Beiderlinden M, Fernandez-Bustamante A, Futier E, Gajic O, El-Tahan MR, Ghamdi AA, Günay E, Jaber S, Kokulu S, Kozian A, Licker M, Lin WQ, Maslow AD, Memtsoudis SG,

- Reis Miranda D, Moine P, Ng T, Paparella D, Ranieri VM, Scavonetto F, Schilling T, Selmo G, Severgnini P, Sprung J, Sundar S, Talmor D, Treschan T, Unzueta C, Weingarten TN, Wolthuis EK, Wrigge H, Amato MB, Costa EL, de Abreu MG, Pelosi P, Schultz MJ; PROVE Network Investigators: Association between driving pressure and development of postoperative pulmonary complications in patients undergoing mechanical ventilation for general anaesthesia: a meta-analysis of individual patient data. *Lancet Respir Med* 2016; 4:272–80
17. Amato MB, Meade MO, Slutsky AS, Brochard L, Costa EL, Schoenfeld DA, Stewart TE, Briel M, Talmor D, Mercat A, Richard JC, Carvalho CR, Brower RG: Driving pressure and survival in the acute respiratory distress syndrome. *N Engl J Med* 2015; 372:747–55
  18. Aoyama H, Pettenuzzo T, Aoyama K, Pinto R, Englesakis M, Fan E: Association of Driving Pressure With Mortality Among Ventilated Patients With Acute Respiratory Distress Syndrome: A Systematic Review and Meta-Analysis. *Crit Care Med* 2018; 46:300–6
  19. Hemmes SN, Gama de Abreu M, Pelosi P, Schultz MJ: High versus low positive end-expiratory pressure during general anaesthesia for open abdominal surgery (PROVHILO trial): A multicentre randomised controlled trial. *Lancet* 2014; 384:495–503
  20. Levin MA, McCormick PJ, Lin HM, Hosseinian L, Fischer GW: Low intraoperative tidal volume ventilation with minimal PEEP is associated with increased mortality. *Br J Anaesth* 2014; 113:97–108
  21. Lellouche F, Dionne S, Simard S, Bussi eres J, Dagenais F: High tidal volumes in mechanically ventilated patients increase organ dysfunction after cardiac surgery. *ANESTHESIOLOGY* 2012; 116:1072–82
  22. Zhu F, Gomersall CD, Ng SK, Underwood MJ, Lee A: A randomized controlled trial of adaptive support ventilation mode to wean patients after fast-track cardiac valvular surgery. *ANESTHESIOLOGY* 2015; 122:832–40
  23. Anesthesia Clinical Research Committee. Available at <https://anes.med.umich.edu/research/acrc.html>. Accessed June 1, 2019.
  24. Society of Thoracic Surgeons Adult Cardiac Surgery Database Data Specifications 2017. Available at [https://www.sts.org/sites/default/files/documents/ACSD\\_DataSpecificationsV2\\_9.pdf](https://www.sts.org/sites/default/files/documents/ACSD_DataSpecificationsV2_9.pdf). Accessed June 1, 2019.
  25. Freundlich RE, Kheterpal S: Perioperative effectiveness research using large databases. *Best Pract Res Clin Anaesthesiol* 2011; 25:489–98
  26. Kheterpal S: Clinical research using an information system: the multicenter perioperative outcomes group. *Anesthesiol Clin* 2011; 29:377–88
  27. Shroyer AL, Edwards FH, Grover FL: Updates to the Data Quality Review Program: The Society of Thoracic Surgeons Adult Cardiac National Database. *Ann Thorac Surg* 1998; 65:1494–7
  28. Bender SP, Paganelli WC, Gerety LP, Tharp WG, Shanks AM, Housey M, Blank RS, Colquhoun DA, Fernandez-Bustamante A, Jameson LC, Kheterpal S: Intraoperative lung-protective ventilation trends and practice patterns: A report from the Multicenter Perioperative Outcomes Group. *Anesth Analg* 2015; 121:1231–9
  29. Jacobs JP, He X, O'Brien SM, Welke KF, Filardo G, Han JM, Ferraris VA, Prager RL, Shahian DM: Variation in ventilation time after coronary artery bypass grafting: An analysis from the society of thoracic surgeons adult cardiac surgery database. *Ann Thorac Surg* 2013; 96:757–62
  30. Kheterpal S, Healy D, Aziz MF, Shanks AM, Freundlich RE, Linton F, Martin LD, Linton J, Epps JL, Fernandez-Bustamante A, Jameson LC, Tremper T, Tremper KK; Multicenter Perioperative Outcomes Group (MPOG) Perioperative Clinical Research Committee: Incidence, predictors, and outcome of difficult mask ventilation combined with difficult laryngoscopy: A report from the multicenter perioperative outcomes group. *ANESTHESIOLOGY* 2013; 119:1360–9
  31. Shahian DM, O'Brien SM, Filardo G, Ferraris VA, Haan CK, Rich JB, Normand SL, DeLong ER, Shewan CM, Dokholyan RS, Peterson ED, Edwards FH, Anderson RP: The Society of Thoracic Surgeons 2008 cardiac surgery risk models: Part 1—coronary artery bypass grafting surgery. *Ann Thorac Surg* 2009; 88:S2–22
  32. Esteve F, Lopez-Delgado JC, Javierre C, Skaltsa K, Carrio ML, Rodr guez-Castro D, Torrado H, Farrero E, Diaz-Prieto A, Ventura JL, Ma ez R: Evaluation of the PaO<sub>2</sub>/FiO<sub>2</sub> ratio after cardiac surgery as a predictor of outcome during hospital stay. *BMC Anesthesiol* 2014; 14:83
  33. C rdenas-Turanzas M, Ensor J, Wakefield C, Zhang K, Wallace SK, Price KJ, Nates JL: Cross-validation of a Sequential Organ Failure Assessment score-based model to predict mortality in patients with cancer admitted to the intensive care unit. *J Crit Care* 2012; 27:673–80
  34. Ranieri VM, Rubenfeld GD, Thompson BT, Ferguson ND, Caldwell E, Fan E, Camporota L, Slutsky AS: Acute respiratory distress syndrome: The Berlin Definition. *JAMA* 2012; 307:2526–33
  35. Abbott TEF, Fowler AJ, Pelosi P, Gama de Abreu M, M ller AM, Canet J, Creagh-Brown B, Mythen M, Gin T, Lalu MM, Futier E, Grocott MP, Schultz MJ, Pearse RM; StEP-COMPAC Group: A systematic review and consensus definitions for standardised end-points in perioperative medicine: pulmonary complications. *Br J Anaesth* 2018; 120:1066–79
  36. Jammer I, Wickboldt N, Sander M, Smith A, Schultz MJ, Pelosi P, Leva B, Rhodes A, Hoeft A, Walder B, Chew MS, Pearse RM; European Society of Anaesthesiology (ESA) and the European Society of

- Intensive Care Medicine (ESICM); European Society of Anaesthesiology; European Society of Intensive Care Medicine: Standards for definitions and use of outcome measures for clinical effectiveness research in perioperative medicine: European Perioperative Clinical Outcome (EPCO) definitions: A statement from the ESA-ESICM joint taskforce on perioperative outcome measures. *Eur J Anaesthesiol* 2015; 32:88–105
37. Ladha K, Vidal Melo MF, McLean DJ, Wanderer JP, Grabitz SD, Kurth T, Eikermann M: Intraoperative protective mechanical ventilation and risk of postoperative respiratory complications: Hospital based registry study. *BMJ* 2015; 351:h3646
  38. Futier E, Constantin JM, Fau-Paugam-Burtz C, Paugam-Burtz C, Fau-Pascal J, Pascal J, Fau-Eurin M, Eurin M, Fau-Neuschwander A, Neuschwander A, Fau-Marret E, Marret E, Fau-Beaussier M, Beaussier M, Fau-Gutton C, Gutton C, Fau-Lefrant J-Y, Lefrant Jy, Fau-Allaouchiche B, Allaouchiche B, Fau-Verzilli D, Verzilli D, Fau-Leone M, Leone M, Fau-De Jong A, De Jong A, Fau-Bazin J-E, Bazin J, Fau-Pereira B, Pereira B, Fau-Jaber S, Jaber S: A trial of intraoperative low-tidal-volume ventilation in abdominal surgery 20130801 DCOM- 20130806
  39. Schultz MJ, Haitsma JJ, Slutsky AS, Gajic O: What tidal volumes should be used in patients without acute lung injury? *ANESTHESIOLOGY* 2007; 106:1226–31
  40. Douville NJ, Jewell ES, Duggal N, Blank R, Kheterpal S, Engoren MC, Mathis MR: Association of intraoperative ventilator management with postoperative oxygenation, pulmonary complications, and mortality *Anesth Analg* 2019 doi:10.1213/ane.0000000000004191
  41. Brower RG, Matthay MA, Morris A, Schoenfeld D, Thompson BT, Wheeler A: Ventilation with lower tidal volumes as compared with traditional tidal volumes for acute lung injury and the acute respiratory distress syndrome. *N Engl J Med* 2000; 342:1301–8
  42. Blum JM, Stentz MJ, Dechert R, Jewell E, Engoren M, Rosenberg AL, Park PK: Preoperative and intraoperative predictors of postoperative acute respiratory distress syndrome in a general surgical population. *ANESTHESIOLOGY* 2013; 118:19–29
  43. Chalmers J, Pullan M, Fabri B, McShane J, Shaw M, Mediratta N, Poullis M: Validation of EuroSCORE II in a modern cohort of patients undergoing cardiac surgery. *Eur J Cardiothorac Surg* 2013; 43:688–94
  44. Tibshirani R: Regression shrinkage and selection via the LASSO. *J R Stat Soc Series B Stat Methodol* 1996; 58:267–88
  45. Katz MH: Multivariable analysis: A primer for readers of medical research. *Ann Intern Med* 2003; 138:644–50
  46. Stephens RS, Whitman GJ: Postoperative critical care of the adult cardiac surgical patient. Part I: Routine postoperative care. *Crit Care Med* 2015; 43:1477–97
  47. Stephens RS, Whitman GJ: Postoperative critical care of the adult cardiac surgical patient: Part II: Procedure-specific considerations, management of complications, and quality improvement. *Crit Care Med* 2015; 43:1995–2014
  48. Park M, Ahn HJ, Kim JA, Yang M, Heo BY, Choi JW, Kim YR, Lee SH, Jeong H, Choi SJ, Song IS: Driving pressure during thoracic surgery: A randomized clinical trial. *ANESTHESIOLOGY* 2019; 130:385–93
  49. Evans RG, Naidu B: Does a conservative fluid management strategy in the perioperative management of lung resection patients reduce the risk of acute lung injury? *Interact Cardiovasc Thorac Surg* 2012; 15:498–504
  50. Hristovska AM, Duch P, Allingstrup M, Afshari A: Efficacy and safety of sugammadex *versus* neostigmine in reversing neuromuscular blockade in adults. *Cochrane Database Syst Rev* 2017; 8:CD012763
  51. Murphy GS, Brull SJ: Residual neuromuscular block: lessons unlearned. Part I: Definitions, incidence, and adverse physiologic effects of residual neuromuscular block. *Anesth Analg* 2010; 111:120–8
  52. Wong WT, Lai VK, Chee YE, Lee A: Fast-track cardiac care for adult cardiac surgical patients. *Cochrane Database Syst Rev* 2016; 9:CD003587
  53. Damas P, Fripiat F, Ancion A, Canivet JL, Lambermont B, Layios N, Massion P, Morimont P, Nys M, Piret S, Lancellotti P, Wiesen P, D'orio V, Samalea N, Ledoux D: Prevention of ventilator-associated pneumonia and ventilator-associated conditions: A randomized controlled trial with subglottic secretion suctioning. *Crit Care Med* 2015; 43:22–30
  54. Mahmoodpoor A, Hamishehkar H, Hamidi M, Shadvar K, Sanaie S, Golzari SE, Khan ZH, Nader ND: A prospective randomized trial of tapered-cuff endotracheal tubes with intermittent subglottic suctioning in preventing ventilator-associated pneumonia in critically ill patients. *J Crit Care* 2017; 38:152–6
  55. Henderson WR, Chen L, Amato MBP, Brochard LJ: Fifty years of research in ARDS: Respiratory mechanics in acute respiratory distress syndrome. *Am J Respir Crit Care Med* 2017; 196:822–33



## Appendix 1. Postoperative Pulmonary Complications – Data Definitions

| Postoperative Pulmonary Complication Component                                                                  | Data Source                                                                  | Definition                                                                                                                                                                                                                                                                                                                                                          |
|-----------------------------------------------------------------------------------------------------------------|------------------------------------------------------------------------------|---------------------------------------------------------------------------------------------------------------------------------------------------------------------------------------------------------------------------------------------------------------------------------------------------------------------------------------------------------------------|
| Prolonged initial postoperative ventilator duration longer than 24 h                                            | STS database                                                                 | Yes/No Indicate whether the patient had prolonged postoperative pulmonary ventilation longer than 24.0 h.                                                                                                                                                                                                                                                           |
| Pneumonia                                                                                                       | STS database                                                                 | Yes/No Indicate whether the patient had pneumonia according to the Centers for Disease Control and Prevention definition.                                                                                                                                                                                                                                           |
| Reintubation                                                                                                    | STS database                                                                 | Yes/No Indicate whether the patient was reintubated during the hospital stay after the initial extubation. This may include patients who have been extubated in the OR and require intubation in the postoperative period.                                                                                                                                          |
| Postoperative PaO <sub>2</sub> :FiO <sub>2</sub> below 100 mmHg within 48 hours postoperatively while intubated | Hospital enterprise electronic health record (Epic Systems Corporation, USA) | Yes/No Indicate whether the patient had a postoperative PaO <sub>2</sub> :FiO <sub>2</sub> below 100 mmHg within 48 h while intubated: <ul style="list-style-type: none"> <li>• Intubated determined by ventilator mode</li> <li>• FiO<sub>2</sub> determined by ventilator setting</li> <li>• PaO<sub>2</sub> determined by arterial blood gas analysis</li> </ul> |

FiO<sub>2</sub>, fraction of inspired oxygen; PaO<sub>2</sub>, arterial partial pressure of oxygen; STS, Society of Thoracic Surgeons.

## ANESTHESIOLOGY REFLECTIONS FROM THE WOOD LIBRARY-MUSEUM

## Dr. Rudolph Matas: Surgeon, Author, and an American Pioneer of Spinal Anesthesia

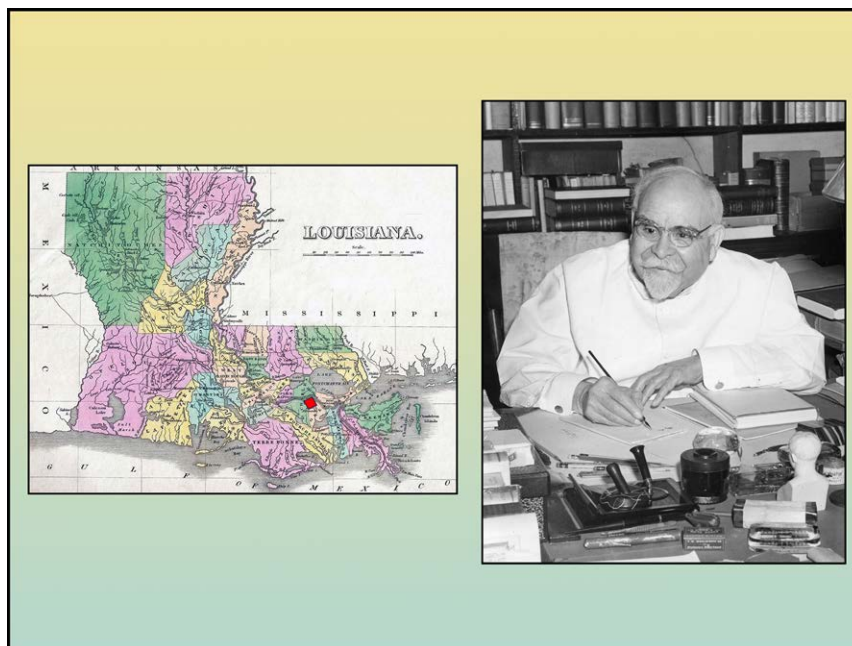

Born in Bonnet Carre, Louisiana (see red diamond, left), Rudolph Matas (1860 to 1957) was raised in Spain and then Texas before returning to his birth state for eventual medical schooling at the future Tulane University School of Medicine. After earning his M.D. at 19 yr of age, Dr. Matas began transforming himself into “the most learned surgeon” that Dr. Will Mayo had “ever known.” Along the way, in 1889, Dr. Matas would also conduct America’s first spinal anesthetic. By December of 1940, Matas was completing his eighth year of penning (right) a five-volume medical history of Louisiana. (Copyright © the American Society of Anesthesiologists’ Wood Library-Museum of Anesthesiology.)

*George S. Bause, M.D., M.P.H., Honorary Curator and Laureate of the History of Anesthesia, Wood Library-Museum of Anesthesiology, Schaumburg, Illinois, and Clinical Associate Professor, Case Western Reserve University, Cleveland, Ohio. UJYC@aol.com.*
